# Supplementary material for: Phosphoric acid functionalized pre-sintered meso-silica for high temperature proton exchange membrane fuel cells
Source: Royal Society of Chemistry journal article supplement (doi:10.1039/c3cc41716f), 2013-01-01
Supplement: c3cc41716f.pdf [file c3cc41716f.pdf]

## Supporting Information

### Phosphoric acid functionalized pre-sintered *meso*-silica for high temperature proton exchange membrane fuel cells

Jie Zeng,<sup>a</sup> Beibei He,<sup>a</sup> Krystina Lamb,<sup>b</sup> Roland De Marco,<sup>b</sup> Pei Kang Shen,<sup>c</sup> San Ping Jiang,<sup>\*a</sup>

#### Experiments and characterization

The synthesis of mesoporous silica was based the procedures reported in the literature.<sup>1-4</sup> Pluronic surfactant and hydrochloric acid were dissolved in deionized-water according to a certain ratio. Then, butanol was added at 45°C and after stirring for 1 h, tetraethylorthosilicate (TEOS, Sigma-Aldrich) was added; the synthesis was carried out in a hydrothermal reactor. The mixture was further stirred vigorously at 45°C for 24h and subsequently was aged at 100°C for 24 h; then the mixture was dried at room temperature for 24h. The powder was calcinated at temeptratures range of 550°C for 6h and N<sub>2</sub> was used as protective gas at temperature below 200°C. The as-prepared meso-silica powder was mixed with PVA binder (5wt%) and the die pressed to form meso-silica discs. The discs were then sintered at temperature range of 550 to 850°C. The sintered meso-silica discs were then polished to thickness of 0.2 to 0.5 mm and impregnated in a 83%wt phosphoric acid (PA) solution for 24 h, forming PA-functionalized meso-silica (PA/*meso*-silica) membranes

Small angle X-ray scattering (SAXS) spectra were carried on a SAXSess high-flux small-angle X-ray scattering instrument (AntoPaar GmbH) equipped with two-dimensional wire detector and a Cu ( $\lambda=0.1542\text{nm}$ ) rotating anode operated at 80 kV and 40 mA. Nitrogen adsorption/desorption isotherms were measured using a Micromeritics ASAP Tristar II 3020 system. Specific surface area was calculated using the Brumauer-Emmett-Teller (BET) method. The total pore volumes were estimated from the adsorbed amount at the relative pressure of  $P/P_0=0.95$  and the pore size distributions were obtained from the adsorption branch of the isotherms by using the non-linear density function theory (NLDFT) method. TEM micrographs were obtained using a JSM-2100F JEOL electron microscope equipped with EDX-detector (Noran Instr.) and operated at 200 kV with a cold-field emission source. TGA was carried out on a TG/DTA Q500 from 30 to 500 °C at a heating rate of 10 °C min<sup>-1</sup> under nitrogen flow of 40 ml min<sup>-1</sup>. FTIR absorption spectra of the PA/*meso*-silica composite membranes were recorded with a JASCO FTIR-Q250 spectrometer (spectral range of 4000-200 cm<sup>-1</sup>, 50 scans, and a resolution of 1 cm<sup>-1</sup>).

The membrane-electrode-assembly (MEA) based on PA/*meso*-silica membrane disc was assembled. The PA/*meso*-silica disc was 5cm in diameter and 220μm in thickness. A mixture of PtRu/C catalyst (40% Pt and 20% Ru on Vulcan XC-72R Carbon, Johnson Matthey), Nafion solution (5 wt % in a mixture of aliphatic alcohols, Sigma Aldrich), and isopropyl alcohol (Sigma-Aldrich) was sprayed onto a carbon gas diffusion layer (Toray Graphite Paper, TGPH-120, 40% wet-proofed, E-TEK, Inc.) by airbrushing until a platinum loading of 3 mg cm<sup>-2</sup> was achieved for the anode. The same procedure was used for the cathode with Pt loading of 2 mg cm<sup>-2</sup> (60% Pt on Vulcan XC-72R Carbon, Johnson Matthey). The electrode area was 4.0 cm<sup>2</sup>. Methanol fuel was pumped with a peristaltic pump and the methanol flow rate of 2 mL min<sup>-1</sup> was regulated with a recirculation loop and measured by a flowmeter (Alicat Scientific) before being fed into a vaporizer. The steam generated in this way entered the anodic compartment of the DMFC.

Proton conductivity measurements of PA/*meso*-silica membrane disc were performed by a four-probe method, using electrochemical impedance spectroscopy (PGSTAT30/FRA, Autolab, Netherlands) over the frequency range from 1Hz to 1MHz. In the temperatures range from 75 to 225 °C, the conductivity of PA/*meso*-silica membrane was measured with no external humidification. For the purpose of comparison, Nafion 117 membrane was also measured and in the temperature range of 25-80°C the relative humidity (RH) of the measurements was controlled by a PEMFC test station (FCATS-G050, Greenlight, Canada). The cell performance was measured with the methanol flow rate of 2 mL min<sup>-1</sup> and the O<sub>2</sub> flow rate of 40mL min<sup>-1</sup>. No back pressure control of both sides in this work.

## Additional Results

Figure S1 is the SAXS spectra of *meso*-silica membrane discs sintered at different temperatures. The sample before sintering show well-resolved scattering peaks and characteristic SAXS patterns of *Ia* $\bar{3}d$  symmetry<sup>5</sup>, suggesting the successful formation of the well-ordered *Ia* $\bar{3}d$  mesoporous structure. The increase of sintering temperatures from 550 °C to 750 °C caused a pronounced shift of the characteristic SAXS peaks towards higher angles, an evidence for the contraction of unit cell parameter ( $a$ ) of the mesoporous silica from 24.2 nm to 21.9 nm. It is also noted that the intensity of major SAXS peaks were firstly enhanced for *meso*-silica treated at higher temperatures and reached a peak value at 650 °C, the peak intensity decreases significantly as sintering temperature increases to 750 °C. At a sintering temperature of 850°C, the peak (211) disappeared completely. This indicates that the ordered

structure of mesoporous silica is stable at sintering temperature 650 °C and becomes disordered at sintering temperatures 750 °C or higher.

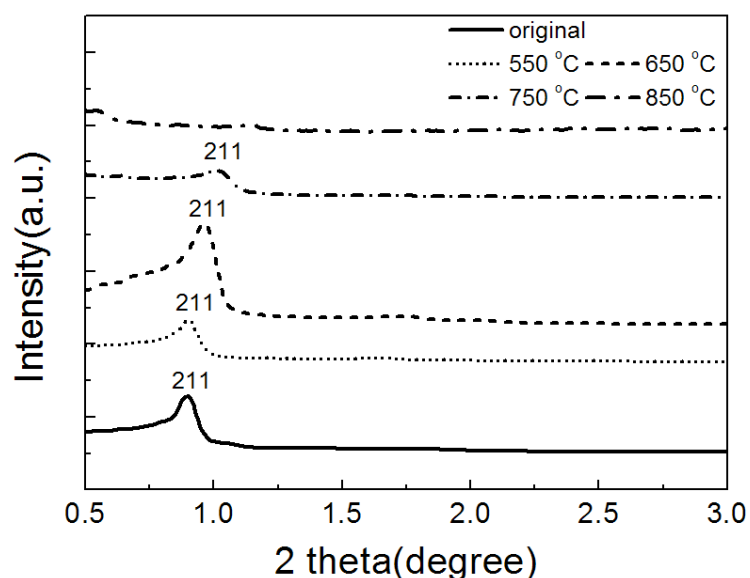

**Figure S1.** Small-angle X-ray scattering patterns of mesoporous silica disc sintered at various temperatures from 550 to 850 °C.

The porosity and BET surface areas of original and sintered meso-silica were measured by nitrogen absorption. The N<sub>2</sub> sorption isotherms feature typical type-IV associated with a distinct step at relative pressure of ~0.7 that is attributed to nitrogen condensation in narrow size distribution mesopores for all samples except meso-silica sintered at 850°C (meso-silica-850). The results show that for meso-silica sintered at 650°C, the mesopore diameter is 8.2 nm, similar to that measured on meso-silica powder before sintering (see Table S1).

**Table S1.** Textural parameters of mesoporous silica family and the inclusion compound

| Samples                        | Unit cell $a$ (nm) <sup>a</sup> | $S_{\text{BET}}$ (m <sup>2</sup> g <sup>-1</sup> ) | Pore vol (cm <sup>3</sup> g <sup>-1</sup> ) <sup>b</sup> | Poresize (nm) <sup>c</sup> | Wall thickness (nm) <sup>d</sup> |
|--------------------------------|---------------------------------|----------------------------------------------------|----------------------------------------------------------|----------------------------|----------------------------------|
| Meso-silica (before sintering) | 24.2                            | 913                                                | 1.146                                                    | 8.2                        | 5.0±0.2                          |
| Meso-silica-550                | 24.0                            | 936                                                | 1.238                                                    | 8.2                        | 4.8±0.2                          |
| Meso-silica-650                | 22.6                            | 948                                                | 1.312                                                    | 8.2                        | 4.2±0.2                          |
| Meso-silica-750                | 21.9                            | 522                                                | 0.488                                                    | 8.0                        | 3.9±0.6                          |
| Meso-silica-850                | N.A.                            | 87                                                 | 0.131                                                    | N.A.                       | N.A.                             |

<sup>a</sup> Calculated from SAXS results

<sup>b</sup> Cumulative pore volume

<sup>c</sup> Calculated from the adsorption branch of the isotherms based on the NLDFT method

<sup>d</sup> Estimated from SAXS and BET results

The thermal properties of nonporous silica based and mesoporous silica based membranes are assessed with TGA (**Figure S2**). In the case of *meso*-silica, the weight loss mainly occurs

at temperature around 60 °C, which is attributed to the dehydration of adsorbed water. The dry meso-silica membrane contains ca. 1.2 wt % water, compared to ca. 26 wt % for the fully hydrated mesoporous silica.

On the other hand, the mesoporous silica/PA membrane exhibit two distinct weight loss processes in temperature range of 30-800 °C. The first weight loss start from ambient temperature to 100 °C is mainly attributed to absorbed water from the doping phosphoric acid solution and some less stable phosphoric acid on the membrane surface. The second loss centered at around 200 °C is assigned to the evaporation of phosphoric acid. The high doping level of H<sub>3</sub>PO<sub>4</sub> in meso-silica/PA reflected in the total weight loss of 38 % at 800 °C, which ascribed to the dehydration of doped PA solution. The high doping level reflects the large pore volume of the meso-silica membrane.

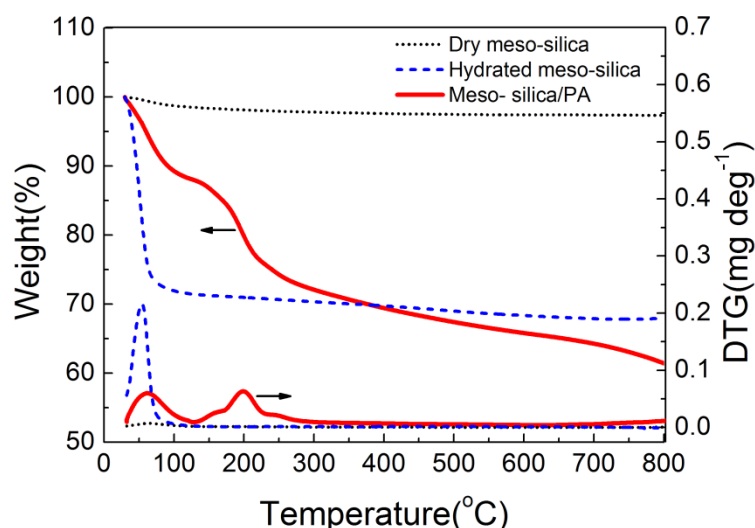

**Figure S2.** Thermogravimetric analyses (TGA) of dry meso-silica membrane, hydrated meso-silica membrane and meso-silica/PA membrane; the numbers showed in the figures give the weight loss percentage at 200°C.

**Figure S3a** is the FTIR spectra of mesoporous silica and PA/meso-silica. A weak band at 1612 cm<sup>-1</sup> can be ascribed to the O-H vibration of adsorbed water; in addition, a broad band at 801 cm<sup>-1</sup> is observed, which is the characteristic of the vibrations of Si-O-Si.<sup>6</sup> The FTIR spectra of H<sub>3</sub>PO<sub>4</sub>-doped meso-silica before and after ageing in PA solution showed the characteristic peaks of phosphoric acid moiety;  $\delta$ P=O and  $\delta$ P-O appeared at 951 and 894 cm<sup>-1</sup>, respectively, besides, the couple bands at 1050 and 765 cm<sup>-1</sup> are assigned to the in-plane and out-of-plane bending modes of P-O-H, respectively.<sup>7,8</sup> These indicate the success of immobilization process. The spectra also observed a significant shift of O-H vibration of adsorbed water from 1612 to 1634 cm<sup>-1</sup>, which results from the protonation of water within the membrane.

The Raman scattering spectra of meso-silica, meso-silica/PA and aged meso-silica/PA membranes are given in **Figure S3b**. Compared with the spectrum of un-doped meso-silica membrane, significant difference can be observed in the spectra of meso-silica/PA membranes. The very strong bands appear at  $900\text{ cm}^{-1}$  can be ascribed to the P-O stretching of  $\text{H}_3\text{PO}_4$ , the O-H stretching leads to another strong band at  $2026\text{ cm}^{-1}$ . Besides, the bands at  $376$  and  $488\text{ cm}^{-1}$  is assigned to the vibration mode of P-O in the phosphate group, which indicates the formation of P-O-P and/or Si-O-P bonds in the composite PA/meso-silica membrane.

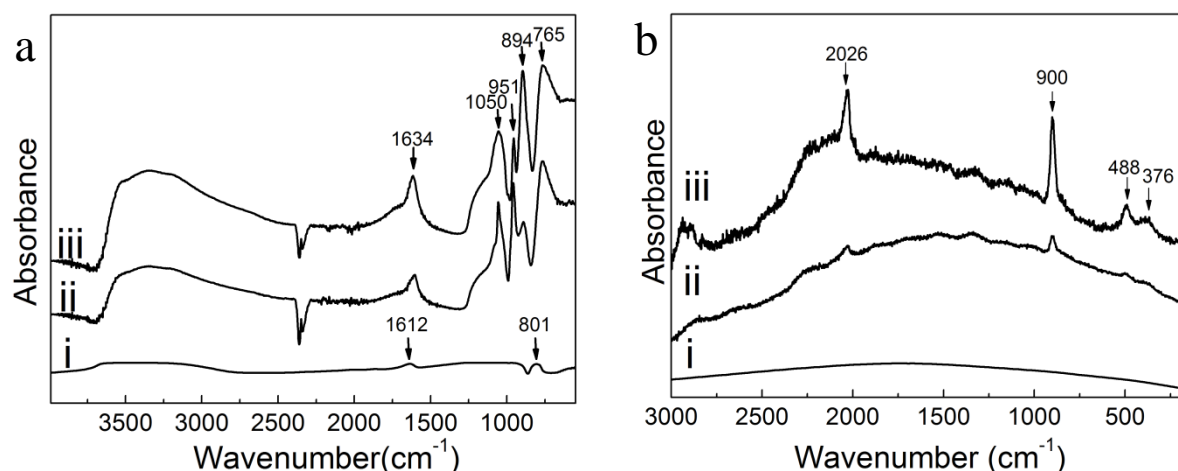

**Figure S3.** (a) FTIR and (b) Raman spectra of (i) meso-silica membrane, (ii) meso-silica/PA membrane, (iii) and meso-silica/PA membrane aged in phosphoric acid for 8 months.

## References:

1. F. Kleitz, D. Liu, G. M. Anilkumar, I.-S. Park, L. A. Solovyov, A. N. Shmakov and R. Ryoo, *The Journal of Physical Chemistry B*, 2003, **107**, 14296-14300.
2. F. Kleitz, S. H. Choi and R. Ryoo, *Chemical Communications*, 2003, 2136-2137.
3. F. Kleitz, L. A. Solvyov, G. M. Anilkumar, S. H. Choi and R. Ryoo, *Chemical Communications*, 2004, 1536-1537.
4. D. H. Chen, Z. Li, C. Z. Yu, Y. F. Shi, Z. D. Zhang, B. Tu and D. Y. Zhao, *Chem. Mat.*, 2005, **17**, 3228-3234.
5. Y. Wan and D. Y. Zhao, *Chem. Rev.*, 2007, **107**, 2821-2860.
6. W. J. Liang, S. J. Hsieh, C. Y. Hsu, W. F. Chen and P. L. Kuo, *Journal of Polymer Science Part B-Polymer Physics*, 2006, **44**, 2135-2144.
7. A. M. Donia, A. A. Atia, A. M. Daher and E. A. Elshehy, *Journal of Dispersion Science and Technology*, 2011, **32**, 193-202.
8. B. Boonchom, C. Danvirutai, S. Youngme and S. Maensiri, *Industrial & Engineering Chemistry Research*, 2008, **47**, 7642-7647.
